# Supplementary material for: Packing motifs in organic ammonium carboxylate salts: extension of the ring-stacking and ring-laddering concepts
Source: Royal Society of Chemistry journal article supplement (doi:10.1039/c000922a), 2010-01-01
Supplement: c000922a.pdf [file c000922a.pdf]

**ammonium carboxylate salts (68)**

ACARBM01  
ACARBM02  
AHPHAL01  
AHTPAL01  
AIPMLM  
AMACET  
AMDFAC  
AMFORM  
AMHMAM  
AMHTAR01  
AMMFAC  
AMOXAM  
AMTART11  
BAGDOC  
BAWPOE  
BEBPAA  
BIHWEV  
CARVIA  
DAMPHL  
EVOQAH  
EWOZOF  
FANVOF  
FANVUL  
FUQDEA  
GEDPIP  
GEJKUC  
GIJYON  
GINNOH  
GUKZOB  
GUKZUH  
HIBZUN  
ICUJIA  
ICUJUM  
IJICIN  
JUBPUR  
KEZNIM  
KIYFED  
KUYIAH  
MAQDAJ  
MECTAQ  
MOYHAJ  
NANMOF  
NARDEP  
NIFBOT02

**monoNH<sub>3</sub> and monoCOO ammonium  
carboxylate salts with no competing H-**

**bonding (10)**

AMACET  
AMDFAC  
AMFORM  
AMMFAC  
EVOQAH  
GUKZOB  
GUKZUH  
ICUJIA  
ICUJUM  
SESCAV

PAHXOL  
PATTAF  
PELQAY  
PEWHEE03  
PUSYOR  
PUXKAU01  
QUQFEN  
SAJCOW  
SESCAV  
TEJNAX  
TELCUI  
TERNEJ  
VAFBUA  
VOHMOU  
WAJBOY  
WAJNAX  
WASBUO  
WERCEB  
XAJFIX  
XIYTEF  
YAGZUC  
YIPTIA  
ZZZJII01  
ZZZSAC01

| <u>primary ammonium carboxylate salts (532)</u> | <u>monoNH3 and monoCOO primary ammonium carboxylate salts with no competing H-bonding (147)</u> | <u>nets</u> |
|-------------------------------------------------|-------------------------------------------------------------------------------------------------|-------------|
| ADAPUR                                          | AFINEJ                                                                                          | ASOMIE      |
| AFINEJ                                          | ASOLUP                                                                                          | ASONEB      |
| AHERAG                                          | ASOMAW                                                                                          | ASOPIH      |
| AKIZAV                                          | ASOMEA                                                                                          | ATEQUL      |
| ASOLUP                                          | ASOMIE                                                                                          | ISERON      |
| ASOMAW                                          | ASOMOK                                                                                          | ISERUT      |
| ASOMEA                                          | ASONAX                                                                                          | ISESAA      |
| ASOMIE                                          | ASONEB                                                                                          | ISESEE      |
| ASOMOK                                          | ASONIF                                                                                          | ISESII      |
| ASONAX                                          | ASONOL                                                                                          | ISESOO      |
| ASONEB                                          | ASOPIH                                                                                          | ISESUU      |
| ASONIF                                          | ATEQUL                                                                                          | ISETOP      |
| ASONOL                                          | BIMDUX                                                                                          | ISETUV      |
| ASOPIH                                          | CEKHIK                                                                                          | ISEVEH      |
| ASULOP                                          | CEKHOQ                                                                                          | ISEVOR      |
| ATEQUL                                          | CEKHUW                                                                                          | JEPYOT      |
| ATUVEQ                                          | CEKJEI                                                                                          | JEPYUZ      |
| AWOQUY                                          | CEKJIM                                                                                          | JEPZAG      |
| BACATP                                          | CELQUG                                                                                          | JEQBAJ      |
| BAKMOP                                          | COBKUZ                                                                                          | KESJOI      |
| BALVOZ                                          | DAMWUK                                                                                          | KUKCIC      |
| BALXER                                          | DEQYIH                                                                                          | KUKCOI      |
| BANPUC                                          | FEMGAF                                                                                          | KUKCUO      |
| BIJDOO                                          | FEMGEJ                                                                                          | QEHWIK      |
| BILTIA                                          | FUSJAE                                                                                          | QOBFES      |
| BIMBOP                                          | FUSJEI                                                                                          | VEHQOP      |
| BIMDUX                                          | GARVAW                                                                                          | VEHQUV      |
| BIVLOH                                          | GEYLIF                                                                                          | WIVPUM      |
| BOQTEG                                          | GICHEG                                                                                          | XUVXAN      |
| BOQXIO                                          | GIVFIB                                                                                          | XUVXER      |
| BOYDUO                                          | HIFRIX                                                                                          | YABVAY      |
| BUCQEV                                          | HISREG                                                                                          | YABVEC      |
| BUFYIK                                          | HISRIK                                                                                          | YABVIG      |
| BUQDOG                                          | IRUYEZ                                                                                          | ZUSPAE      |
| BUXGOQ                                          | ISERON                                                                                          |             |
| CARGIM                                          | ISERUT                                                                                          |             |
| CARGOS                                          | ISESAA                                                                                          |             |
| CASTOG                                          | ISESEE                                                                                          |             |
| CECPOP03                                        | ISESII                                                                                          |             |
| CEFZUJ                                          | ISESOO                                                                                          |             |
| CEKHIK                                          | ISESUU                                                                                          |             |
| CEKHOQ                                          | ISETAB                                                                                          |             |
| CEKHUW                                          | ISETEF                                                                                          |             |
| CEKJEI                                          | ISETOP                                                                                          |             |

|          |          |
|----------|----------|
| CEKJIM   | ISETUV   |
| CELQUG   | ISEVEH   |
| CINMAO   | ISEVIL   |
| COBKUZ   | ISEVOR   |
| COYDUP   | ISEVUX   |
| CUVKOT   | IWIMAC   |
| DAMNAH   | IWUWUS   |
| DAMWUK   | JASJIX   |
| DAZSON   | JASJOD   |
| DAZSUT   | JASJUJ   |
| DAZTAA   | JEJNES   |
| DEQHUC   | JEPXUY   |
| DEQYED   | JEPYAF   |
| DEQYIH   | JEPYEJ   |
| DEVGEQ   | JEPYIN   |
| DEWLIA   | JEPYOT   |
| DIGQIT   | JEPYUZ   |
| DIKSUM   | JEPZAG   |
| DOJQUO   | JEPZEK   |
| DOJTBE   | JEPZIO   |
| ECAJIC   | JEPZOU   |
| EDASUX   | JEPZUA   |
| EDATAR01 | JEQBAJ   |
| EDAXIQ   | JEQBEN   |
| EKELUB   | JEQBIR   |
| EMIMAO   | KESJOI   |
| ENHCIT   | KUKCIC   |
| ERIKOF   | KUKCOI   |
| ETAYOR   | KUKCUO   |
| EWKOG    | MIBTOH   |
| EXEVOS   | MIYLUB   |
| EXZPEA10 | NENYOU   |
| EYOBAY   | NMACEP03 |
| FACXUD   | OCAHEG   |
| FALFED   | PBUPEA01 |
| FAPXUP   | PBUPEA02 |
| FAQVAV   | PBUPEA03 |
| FEDHAY   | PEAPEA10 |
| FEMGAF   | PEBCUV   |
| FEMGEJ   | PEBDEG   |
| FETNEY   | PEBDIK   |
| FEXQOP   | PIGGOC   |
| FIJXIF   | PMACEP01 |
| FINZIM   | PUGQUD   |
| FIPCUD   | PUPBIL   |
| FITYIQ   | QANPIF   |
| FLCTRT   | QANPOL   |

|          |        |
|----------|--------|
| FOBRAQ   | QANPUR |
| FOMFAP   | QEBVOI |
| FOMFET   | QEHWIK |
| FOMFIX   | QEVSAL |
| FOMFOD   | QOBFES |
| FOPMIG   | RAHLIV |
| FUMNOQ10 | RUTYUA |
| FUSJAE   | SAFCIM |
| FUSJEI   | TEPQIO |
| GAKTRA   | TEYXOL |
| GANFOQ   | VAZGIN |
| GARLAN   | VEHQOP |
| GARLER   | VEHQUV |
| GARVAW   | VITGAH |
| GEYLIF   | WALKIE |
| GICHEG   | WANKUR |
| GICHIK   | WIVPUM |
| GICHOQ   | WIVQAT |
| GICHUW   | WIVQEX |
| GINMEW   | WIVQIB |
| GIPHIX   | WIVQOH |
| GIVFIB   | WOSTIH |
| GIVQOR   | XEHHAU |
| GOZDAA   | XOHFOP |
| HAGZUL   | XUVXAN |
| HEFVIY   | XUVXER |
| HESXUY   | YABVAY |
| HEWROR   | YABVEC |
| HEZXAM   | YABVIG |
| HIFRIX   | ZOHPER |
| HIGCUV   | ZOHPOB |
| HIHPOE   | ZOHPUH |
| HISREG   | ZOHQAO |
| HISRIK   | ZOHQES |
| HIVYER   | ZOHQIW |
| HIYREN   | ZOHQOC |
| IAAMTA   | ZOHQUI |
| IBOPIY   | ZOHRAP |
| IBOPOE   | ZOHRET |
| ICIMOX   | ZOHRIX |
| IDOGUE   | ZOHROD |
| IRUYEZ   | ZUSLEE |
| ISERON   | ZUSLII |
| ISERUT   | ZUSLOO |
| ISESAA   | ZUSLUU |
| ISESEE   | ZUSMEF |
| ISESII   | ZUSMOP |

|          |        |
|----------|--------|
| ISESOO   | ZUSMUU |
| ISESUU   | ZUSNAC |
| ISETAB   | ZUSNEG |
| ISETEF   | ZUSNIK |
| ISETOP   | ZUSNOQ |
| ISETUV   | ZUSNUW |
| ISEVEH   | ZUSPAE |
| ISEVIL   | ZUSPEI |
| ISEVOR   | ZUSPIM |
| ISEVUX   |        |
| IWIMAC   |        |
| IWUWUS   |        |
| IYEBIX   |        |
| IZCMAP   |        |
| JADTUD01 |        |
| JAGHEE   |        |
| JAGHII   |        |
| JAQZOQ   |        |
| JASJIX   |        |
| JASJOD   |        |
| JASJUI   |        |
| JEJNES   |        |
| JEKJAL   |        |
| JEKJEP   |        |
| JEKJIT   |        |
| JEKJOZ   |        |
| JEKJUF   |        |
| JEPXUY   |        |
| JEPYAF   |        |
| JEPYEJ   |        |
| JEPYIN   |        |
| JEPYOT   |        |
| JEPYUZ   |        |
| JEPZAG   |        |
| JEPZEK   |        |
| JEPZIO   |        |
| JEPZOU   |        |
| JEPZUA   |        |
| JEQBAJ   |        |
| JEQBEN   |        |
| JEQBIR   |        |
| JIPKOJ   |        |
| JIZJUX   |        |
| JOHJEV   |        |
| JOYYUR   |        |
| JOZCOQ   |        |
| JUYFUE   |        |

KACBEV01  
KALQAP  
KAMREW  
KAPVAY  
KAPVEC  
KAPWAZ  
KAPYIJ  
KAPZOQ  
KAQBAF  
KASXEI  
KEBYAS  
KEBYEW  
KEDYEX  
KESJOI  
KIWWET  
KIXJIK  
KIYFIH  
KOVDUU  
KUJKUV  
KUJLAC  
KUKCIC  
KUKCOI  
KUKCUO  
KUYKOE  
KUYKUK  
LACLOQ  
LACPUA  
LACQAH  
LASABE  
LAYDAQ  
LAYGAT  
LAYGUN  
LAYKAX  
LECCIF  
LECCOL  
LEJRIB  
LIGZIL  
LIGZUX  
LIHBK  
LIHBIO  
LIJNAT  
LIJNEX  
LIWHAA  
LIWHEE  
LIYZOI  
LOCJET  
LOCLOF

LUDWIQ  
LUMQIT  
LUMQOZ  
LUMQUF  
LUMRAM  
LUMSAN  
MAFPIT  
MAMADP  
MAMHOX  
MAPYEI  
MAPYOS  
MEGVEZ  
MEGVID  
MEGVOJ01  
MEGVUP  
MEGWAW  
MEGWEA  
MEGWIE  
MEGWOK  
MELVAB  
MEVZAO  
MIAMTA  
MIBTOH  
MIPYOZ  
MIYLOV  
MIYLUB  
MOCXUX  
MUPNIU  
MUVXAC  
NAGLYA10  
NANMUL  
NANNIA  
NARDIT  
NEBHIL  
NELPUP  
NENYOU  
NETXUF  
NEVKUV  
NIHCUC  
NMACEP03  
NOJWEO  
NOJWIS  
NOJWOY  
OCAHEG  
ODEBEE  
OGABED  
OGABIH



OKIQAA  
OLOBOG  
PAGZED  
PAPFUI  
PAPGET  
PBUPEA01  
PBUPEA02  
PBUPEA03  
PCACAP  
PEAMAN  
PEAMAN01  
PEAPEA10  
PEBCIJ  
PEBCOP  
PEBCUV  
PEBDEG  
PEBDIK  
PEBDOQ  
PEBDUW  
PEZPOZ  
PIGGOC  
PIHWOS  
PINNIJ  
PIVBAX  
PIVGEG  
PIVGEH01  
PMACEP01  
POBCEO  
POPGIK  
PUGQUD  
PUPBIL  
PXTRBA10  
QAHYAA  
QAHYEE  
QAHYII  
QAHYOO  
QAMPAV  
QAMPEZ  
QAMRIF  
QAMY EJ  
QAMYIN  
QAMYOT  
QAMYUZ  
QANPIF  
QANPOL  
QANPUR  
QAPTEG

QAWSUC  
QAYTEQ  
QEBVOI  
QEFQUN  
QEFRAU  
QEHSON  
QEHVOP  
QEHWIK  
QEFJUG  
QEFJAE  
QEFJEI  
QEMZIS  
QENGUL  
QEPJAX  
QEPJEB  
QEPJIF  
QEPJOL  
QEVSAI  
QEYCAI  
QICBEI  
QOBFES  
QURSUR  
RABPEP  
RABPOZ  
RABPUF  
RAHHIR  
RAHHOX  
RAHLIV  
RARXUD  
RAYQEN  
RAYQIR  
RAYQOX  
RAYQUD  
RAYRAK  
RAYZOG  
RAYZUM  
RENBAN  
REPFEX  
REXSET  
RICGIU  
RIGSEF01  
ROHKUU  
ROLFAZ  
RUPVED  
RUTYUA  
SABJOU  
SAFCIM

SAWFIF  
SEJSOP  
SEQLUV  
SERHOX  
SIMTEO  
SIMITS  
SIMVAM  
SIRKUA  
SOJMIN  
SOJMOT  
TAJQIF  
TEPQIO  
TERFOL  
TEWFOR  
TEWXAU  
TEWXIC  
TEYXOL  
TICPOK  
TIFLAV  
TIFLAV01  
TOHGOM  
TOYMAV  
TOYMEZ  
TPATAA  
TRPPAC  
TRYPTB  
TRYPTF10  
TUDPIR  
UCEVAZ  
UKUMUI  
UKUNET02  
VAGVEF  
VAGVIJ  
VAZDAC  
VAZGIN  
VECJOD  
VEDMAT  
VEHQOP  
VEHQUV  
VEJQAC  
VEJQEG  
VEYSEY  
VIGROS  
VIGRUY  
VIQPUH  
VISSUM  
VISTAT

VITGAH  
VIWFOX  
VOWTEG  
VUJXH02  
VUJXH03  
VUTLOL  
WALKIE  
WANKUR  
WEFMUQ  
WEHZAL  
WELXUG01  
WERLAH  
WERLEL  
WETRAP  
WIFNAB  
WINMUC  
WIPBIH  
WIVPUM  
WIVQAT  
WIVQEX  
WIVQIB  
WIVQOH  
WODTUE  
WODVAM  
WODVEQ  
WODVIU  
WODVOA  
WOSTIH  
WOVYOV  
XAHNUP  
XAHPAX  
XAMWOY  
XAMWUE  
XAMXAL  
XEHHAU  
XIMLAH  
XINSAO  
XINSIW  
XIYSII  
XIZNOJ  
XOHFOP  
XOVTEL  
XOVTUX  
XOVVAF  
XOVVEJ  
XOVVIN  
XOVWEK

XOVWIO  
XOVWUA  
XUVXER  
YABVAY  
YABVEC  
YABVIG  
YAHTOR  
YAHTUX  
YALWEO  
YEJYIV  
YELQAH  
YELQEL  
YETMAL  
YEWLIW  
YEWRIW  
YIFLOP  
YIPMOA  
YIRZUV  
YIVCIQ  
YIWLOW  
YIZGAP  
YOWWOW  
YUFMAN  
YUPYEN  
YUPYIR  
ZAJHAT  
ZATYEV  
ZAVXUP  
ZECROO  
ZECRUU  
ZECSIJ  
ZECSOP  
ZEXPIB  
ZIKRAM  
ZOHPER  
ZOHPOB  
ZOHPUH  
ZOHQAO  
ZOHQES  
ZOHQIW  
ZOHQOC  
ZOHQUI  
ZOHRAP  
ZOHRET  
ZOHRIX  
ZOHROD  
ZUHMEU

ZUNNIF  
ZUSLEE  
ZUSLII  
ZUSLOO  
ZUSLUU  
ZUSMEF  
ZUSMOP  
ZUSMUV  
ZUSNAC  
ZUSNEG  
ZUSNIK  
ZUSNOQ  
ZUSNUW  
ZUSPAE  
ZUSPEI  
ZUSPIM  
ZZZFSC01  
ZZZMBA10

**ladders**    **'cubanes'**    **discrete**

AFINEJ    GIVFIB    MIYLUB  
ASOLUP    MIBTOH    PEBDIK  
ASOMAW    RUTYUA    WIVQEX  
ASOMEA    VITGAH    WIVQIB  
ASOMOK  
ASONAX  
ASONIF  
ASONOL  
BIMDUX  
CEKHIK  
CEKHOQ  
CEKHUW  
CEKJEI  
CEKJIM  
CELQUG  
COBKUZ  
DAMWUK  
DEQYIH  
FEMGAF  
FEMGEJ  
FUSJAE  
FUSJEI  
GARVAW  
GEYLIF  
GICHEG  
HIFRIX  
HISREG  
HISRIK  
IRUYEZ  
ISETAB  
ISETEF  
ISEVIL  
ISEVUX  
IWIMAC  
IWUWUS  
JASJIX  
JASJOD  
JASJUJ  
JEJNES  
JEPXUY  
JEPYAF  
JEPYEJ  
JEPYIN  
JEPZEK

JEPZIO  
JEPZOU  
JEPZUA  
JEQBEN  
JEQBIR  
NENYOU  
NMACEP03  
OCAHEG  
PBUPEA01  
PBUPEA02  
PBUPEA03  
PEAPEA10  
PEBCUV  
PEBDEG  
PIGGOC  
PMACEP01  
PUGQUD  
PUPBIL  
QANPIF  
QANPOL  
QANPUR  
QEBVOI  
QEVSA  
RAHLIV  
SAFCIM  
TEPQIO  
TEYXOL  
VAZGIN  
WALKIE  
WANKUR  
WIVQAT  
WIVQOH  
WOSTIH  
XEHAU  
XOHFOP  
ZOHPER  
ZOHPOB  
ZOHPUH  
ZOHQAO  
ZOHQES  
ZOHQIW  
ZOHQOC  
ZOHQUI  
ZOHRAP  
ZOHRET  
ZOHRIX  
ZOHROD



ZUSLEE  
ZUSLII  
ZUSLOO  
ZUSLUU  
ZUSMEF  
ZUSMOP  
ZUSMUV  
ZUSNAC  
ZUSNEG  
ZUSNIK  
ZUSNOQ  
ZUSNUW  
ZUSPEI  
ZUSPIM
